# Supplementary material for: First Autologous Cell Therapy of Cerebral Palsy Caused by Hypoxic-Ischemic Brain Damage in a Child after Cardiac Arrest—Individual Treatment with Cord Blood
Source: Case Rep Transplant. 2013 May 15;2013:951827. doi: 10.1155/2013/951827 (PMC3671311; doi:10.1155/2013/951827)
Supplement: Supplementary file 1 — Video S1: Brain MRI (FLAIR sequences). Brain MRI (FLAIR sequences) of a 2.5 years old patient (L.B.) 14 days after global hypoxic-ischemic insult caused by cardiac arrest. Note, massive damage as evidenced by signal hyperintensity in almost the entire cortex and basal ganglia. Video S2: Brain MRI (FLAIR DWI sequences with contrast media). Brain MRI (FLAIR DWI sequences with contrast media) of a 2.5 years old patient (L.B.) 14 days after global hypoxic-ischemic insult caused by cardiac arrest. Note, massive damage as evidenced by signal hyperintensity in basal ganglia, caudate nucleus, putamen and particularly in the pallidum. Video S3: Neurologic examination before transplantation. Neurologic examination of the patient (L.B.) in a persistent vegetative state before transplantation of cord blood cells. Note, severe cerebral palsy (tetraspastic ) 9 weeks after global hypoxic-ischemic insult caused by cardiac arrest. Note also, there is no motor control of the head. Video S4: Functional neuroregeneration at two months follow-up. Functional neuroregeneration at two months follow-up after transplantation of cord blood cells. Note, the social smiling and response when the patient (L.B.) is addressed, independent eating of a biscuit, improved motor control of the head, recovered eyesight and hearing. Video S5: Functional neuroregeneration at two years follow-up (a). Functional neuroregeneration at two years follow-up after transplantation of cord blood cells. The patient (L.B.) walks independently in a gait trainer, improved understanding and speaking in response to questions. Note, broad understanding of spoken context. Video S6: Functional neuroregeneration at two years follow-up (b). Functional neuroregeneration at two years follow-up after transplantation of cord blood cells. The patient (L.B.) is steering a remote control car by console with much improved fine motor control in both hands and fingers. Note, the patient moves from prone to free sitting position. [file 951827.f1.zip]

Archive with 7 entries (6 files):
- VideosS1-S6PaperJensenSCI/
- VideosS1-S6PaperJensenSCI/SAVideo1PaperJensenMRI L.B. axial FLAIR longRT clear.avi
- VideosS1-S6PaperJensenSCI/SAVideo2PaperJensenMRI L.B.axial FLAIRDWI.avi
- VideosS1-S6PaperJensenSCI/SAVideo3PaperJensenL.B.gkurz.avi
- VideosS1-S6PaperJensenSCI/SAVideo4PaperJensenL.B.Kurz2+Mama.avi
- VideosS1-S6PaperJensenSCI/SAVideo5PaperJensenL.B.kurz.avi
- VideosS1-S6PaperJensenSCI/SAVideo6PaperJensengkurzL.B.avi
